# Supplementary material for: Evaluation of 41 Candidate Gene Variants for Obesity in the EPIC-Potsdam Cohort by Multi-Locus Stepwise Regression
Source: PubMed Central journal article supplement (PMC3709896; doi:10.1371/journal.pone.0068941), 2013-07-12

**Figure S1: LD plot for ABCC8 gene of the EPIC Potsdam subsample (2,122).**

Disequilibrium coefficient  $r^2$  values were generated using Haploview version 4.2 (Barrett JC et al. Bioinformatics 2005;21(2):263-5). Standard Color Scheme for the LD plots for  $r^2$  were used (for more information see Haploview documentation).

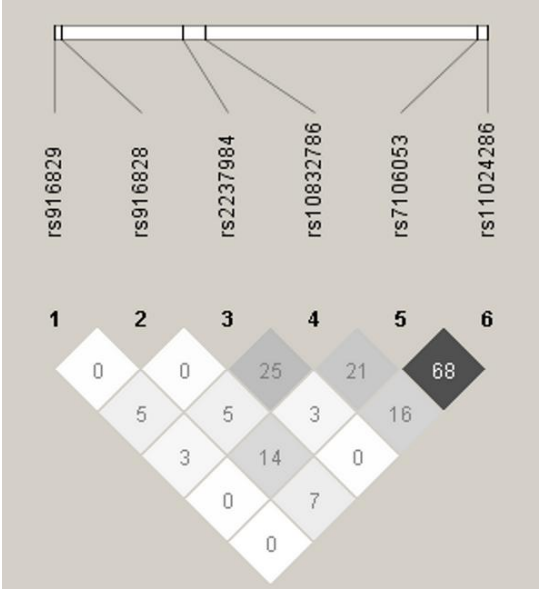

Supplement: pone.0068941.s001.pdf [file pone.0068941.s001.pdf]
