# Supplementary material for: Evaluation of 41 Candidate Gene Variants for Obesity in the EPIC-Potsdam Cohort by Multi-Locus Stepwise Regression
Source: PubMed Central journal article supplement (PMC3709896; doi:10.1371/journal.pone.0068941), 2013-07-12
Supplement: pone.0068941.s003.pdf [file pone.0068941.s003.pdf]

**Table S1: Single haplotype analysis on body-mass index (kg/m<sup>2</sup>) in the EPIC-Potsdam subsample (n=2,122) with adjustment for sex, age at baseline, educational attainment, occupational activity, sports activity, smoking habits, alcohol intake, energy intake, fat intake, and fruit and vegetable intake.**

| <b>Gene</b> | <b>Haplotype</b> | <b>Frequency</b> | <b>Beta</b> | <b>Std.err</b> | <b>p-value</b> |
|-------------|------------------|------------------|-------------|----------------|----------------|
| LEPR        | 221              | 0.256            | -0.16       | 0.14           | 0.2614         |
|             | 112              | 0.161            | -0.11       | 0.17           | 0.5106         |
|             | 111              | 0.374            | 0.04        | 0.13           | 0.7728         |
|             | 121              | 0.199            | 0.23        | 0.16           | 0.1409         |
| HSD11B1     | 111              | 0.830            | -0.18       | 0.16           | 0.2682         |
|             | 222              | 0.052            | -0.01       | 0.28           | 0.9853         |
|             | 212              | 0.064            | 0.23        | 0.25           | 0.3642         |
|             | 211              | 0.053            | 0.30        | 0.28           | 0.2876         |
| TBC1D1      | 1111112112111    | 0.055            | -0.46       | 0.30           | 0.1295         |
|             | 2112112112111    | 0.093            | 0.10        | 0.23           | 0.6557         |
| FABP2       | 22               | 0.259            | -0.22       | 0.14           | 0.1095         |
|             | 12               | 0.174            | -0.05       | 0.16           | 0.7808         |
|             | 11               | 0.566            | 0.20        | 0.12           | 0.1038         |
| ABCC8       | 212111           | 0.093            | -0.43       | 0.21           | 0.0460         |
|             | 121122           | 0.089            | -0.17       | 0.22           | 0.4330         |
|             | 122111           | 0.078            | -0.09       | 0.23           | 0.7062         |
|             | 111111           | 0.400            | 0.15        | 0.12           | 0.2212         |
|             | 112222           | 0.112            | 0.32        | 0.19           | 0.0939         |
| MC4R        | 11               | 0.765            | -0.34       | 0.14           | 0.0154         |
|             | 22               | 0.208            | 0.40        | 0.15           | 0.0062         |

1 = major allele, 2=minor allele
