# Supplementary material for: Evaluation of 41 Candidate Gene Variants for Obesity in the EPIC-Potsdam Cohort by Multi-Locus Stepwise Regression
Source: PubMed Central journal article supplement (PMC3709896; doi:10.1371/journal.pone.0068941), 2013-07-12
Supplement: pone.0068941.s004.pdf [file pone.0068941.s004.pdf]

**Table S2: Single haplotype analysis on waist circumference (cm) in the EPIC-Potsdam subsample (n=2,122) with adjustment for sex, age at baseline, educational attainment, occupational activity, sports activity, smoking habits, alcohol intake, energy intake, fat intake, and fruit and vegetable intake.**

| <b>Gene</b> | <b>Haplotype</b> | <b>Frequency</b> | <b>Beta</b> | <b>Std.err</b> | <b>p-value</b> |
|-------------|------------------|------------------|-------------|----------------|----------------|
| LEPR        | 221              | 0.256            | -0.71       | 0.37           | 0.0516         |
|             | 112              | 0.161            | -0.13       | 0.43           | 0.7534         |
|             | 111              | 0.374            | 0.29        | 0.33           | 0.3751         |
|             | 121              | 0.199            | 0.46        | 0.40           | 0.2579         |
| HSD11B1     | 111              | 0.830            | -0.58       | 0.42           | 0.1753         |
|             | 222              | 0.052            | 0.00        | 0.71           | 0.9978         |
|             | 212              | 0.064            | 0.70        | 0.65           | 0.2816         |
|             | 211              | 0.053            | 0.98        | 0.72           | 0.1749         |
| TBC1D1      | 1111112112111    | 0.055            | -0.66       | 0.77           | 0.3960         |
|             | 2112112112111    | 0.093            | 0.49        | 0.59           | 0.4123         |
| FABP2       | 12               | 0.174            | -0.40       | 0.42           | 0.3422         |
|             | 22               | 0.259            | -0.34       | 0.36           | 0.3357         |
|             | 11               | 0.566            | 0.49        | 0.31           | 0.1213         |
| ABCC8       | 212111           | 0.093            | -0.61       | 0.55           | 0.2662         |
|             | 122111           | 0.078            | -0.29       | 0.60           | 0.6312         |
|             | 121122           | 0.089            | -0.09       | 0.57           | 0.8810         |
|             | 112222           | 0.112            | 0.23        | 0.49           | 0.6350         |
|             | 111111           | 0.400            | 0.39        | 0.32           | 0.2209         |
| MC4R        | 11               | 0.765            | -0.90       | 0.36           | 0.0130         |
|             | 22               | 0.208            | 1.11        | 0.38           | 0.0033         |

1 = major allele, 2=minor allele
