# Supplementary material for: Evaluation of 41 Candidate Gene Variants for Obesity in the EPIC-Potsdam Cohort by Multi-Locus Stepwise Regression
Source: PubMed Central journal article supplement (PMC3709896; doi:10.1371/journal.pone.0068941), 2013-07-12
Supplement: pone.0068941.s005.pdf [file pone.0068941.s005.pdf]

**Table S3: Single haplotype analysis on waist circumference (cm) adjusted for body-mass index (kg/m<sup>2</sup>) in the EPIC-Potsdam subsample (n=2,122) with adjustment for sex, age at baseline, educational attainment, occupational activity, sports activity, smoking habits, alcohol intake, energy intake, fat intake, and fruit and vegetable intake.**

| Gene    | Haplotype     | Frequency | Beta  | Std.err | p-value |
|---------|---------------|-----------|-------|---------|---------|
| LEPR    | 221           | 0.256     | -0.35 | 0.17    | 0.0396  |
|         | 121           | 0.199     | -0.07 | 0.19    | 0.7059  |
|         | 112           | 0.161     | 0.12  | 0.20    | 0.5599  |
|         | 111           | 0.374     | 0.21  | 0.15    | 0.1720  |
| HSD11B1 | 111           | 0.830     | -0.16 | 0.20    | 0.4192  |
|         | 222           | 0.052     | 0.01  | 0.33    | 0.9670  |
|         | 212           | 0.064     | 0.18  | 0.30    | 0.5562  |
|         | 211           | 0.053     | 0.30  | 0.33    | 0.3711  |
| TBC1D1  | 2112112112111 | 0.093     | 0.25  | 0.27    | 0.3583  |
|         | 1111112112111 | 0.055     | 0.38  | 0.36    | 0.2830  |
| FABP2   | 12            | 0.174     | -0.29 | 0.19    | 0.1281  |
|         | 11            | 0.566     | 0.03  | 0.14    | 0.8177  |
|         | 22            | 0.259     | 0.16  | 0.17    | 0.3227  |
| ABCC8   | 112222        | 0.112     | -0.50 | 0.23    | 0.0285  |
|         | 122111        | 0.078     | -0.09 | 0.28    | 0.7526  |
|         | 111111        | 0.400     | 0.04  | 0.15    | 0.7634  |
|         | 121122        | 0.089     | 0.31  | 0.27    | 0.2375  |
|         | 212111        | 0.093     | 0.36  | 0.26    | 0.1543  |
| MC4R    | 11            | 0.765     | -0.12 | 0.17    | 0.4673  |
|         | 22            | 0.208     | 0.19  | 0.17    | 0.2682  |

1 = major allele, 2=minor allele
