# Supplementary material for: Evaluation of 41 Candidate Gene Variants for Obesity in the EPIC-Potsdam Cohort by Multi-Locus Stepwise Regression
Source: PubMed Central journal article supplement (PMC3709896; doi:10.1371/journal.pone.0068941), 2013-07-12
Supplement: pone.0068941.s006.pdf [file pone.0068941.s006.pdf]

Table S4: Evaluation of SNP-gender interaction in 2,122 European middle-aged men and women (random population sample).

| ID | SNP        | Gene    | BMI (kg/m <sup>2</sup> ) |              |                 |                 | Waist circumference (cm) |              |                 |                 | Waist circumference (cm) adjusted for BMI |              |                 |                 |
|----|------------|---------|--------------------------|--------------|-----------------|-----------------|--------------------------|--------------|-----------------|-----------------|-------------------------------------------|--------------|-----------------|-----------------|
|    |            |         | Beta (se)                |              | p (Interaction) | Beta difference | Beta (se)                |              | p (Interaction) | Beta difference | Beta (se)                                 |              | p (Interaction) | Beta difference |
|    |            |         | Men                      | Women        |                 |                 | Men                      | Women        |                 |                 | Men                                       | Women        |                 |                 |
| 1  | rs1137100  | LEPR    | -0.21 (0.18)             | -0.18 (0.19) | 0.90            | -0.03           | -0.87 (0.52)             | -0.54 (0.47) | 0.81            | -0.33           | -0.36 (0.25)                              | -0.15 (0.22) | 0.81            | -0.21           |
| 2  | rs1137101  | LEPR    | 0.00 (0.17)              | 0.02 (0.17)  | 0.99            | -0.02           | -0.61 (0.47)             | -0.06 (0.41) | 0.44            | -0.55           | -0.60 (0.22)                              | -0.10 (0.19) | 0.44            | -0.51           |
| 3  | rs8179183  | LEPR    | -0.06 (0.22)             | -0.14 (0.22) | 0.68            | 0.08            | 0.33 (0.63)              | -0.44 (0.56) | 0.31            | 0.77            | 0.48 (0.29)                               | -0.12 (0.26) | 0.31            | 0.60            |
| 4  | rs4844880  | HSD11B1 | 0.16 (0.23)              | 0.18 (0.23)  | 0.78            | -0.02           | 0.62 (0.65)              | 0.51 (0.56)  | 0.67            | 0.10            | 0.23 (0.30)                               | 0.12 (0.26)  | 0.67            | 0.10            |
| 5  | rs846910   | HSD11B1 | 0.18 (0.38)              | -0.36 (0.37) | 0.31            | 0.54            | 0.36 (1.06)              | -0.96 (0.93) | 0.32            | 1.32            | -0.08 (0.49)                              | -0.16 (0.43) | 0.32            | 0.08            |
| 6  | rs3753519  | HSD11B1 | 0.16 (0.27)              | 0.02 (0.26)  | 0.50            | 0.15            | 0.47 (0.76)              | 0.12 (0.65)  | 0.51            | 0.36            | 0.06 (0.36)                               | 0.08 (0.30)  | 0.51            | -0.01           |
| 7  | rs11127485 | TMEM18  | 0.10 (0.22)              | -0.16 (0.23) | 0.44            | 0.26            | -0.04 (0.63)             | -0.43 (0.57) | 0.72            | 0.39            | -0.28 (0.29)                              | -0.08 (0.26) | 0.72            | -0.20           |
| 8  | rs2241883  | FABP1   | -0.01 (0.17)             | -0.18 (0.17) | 0.54            | 0.17            | -0.33 (0.48)             | -0.39 (0.42) | 0.94            | 0.06            | -0.31 (0.23)                              | 0.00 (0.19)  | 0.94            | -0.31           |
| 9  | rs7566605  | INSIG2  | -0.02 (0.18)             | -0.10 (0.18) | 0.77            | 0.08            | -0.04 (0.50)             | 0.00 (0.45)  | 0.90            | -0.04           | 0.00 (0.23)                               | 0.23 (0.21)  | 0.90            | -0.22           |
| 10 | rs3762521  | ALPI    | 0.07 (0.18)              | -0.05 (0.18) | 0.77            | 0.12            | 0.00 (0.51)              | -0.07 (0.45) | 0.92            | 0.07            | -0.17 (0.24)                              | 0.04 (0.21)  | 0.92            | -0.21           |
| 11 | rs1801282  | PPARG   | -0.09 (0.23)             | 0.47 (0.23)  | 0.11            | -0.55           | -0.44 (0.65)             | 1.45 (0.56)  | 0.03            | -1.89           | -0.22 (0.31)                              | 0.41 (0.26)  | 0.03            | -0.64           |
| 12 | rs2279027  | TBC1D1  | 0.11 (0.17)              | 0.07 (0.17)  | 0.95            | 0.05            | 0.43 (0.47)              | 0.06 (0.42)  | 0.69            | 0.37            | 0.16 (0.22)                               | -0.08 (0.19) | 0.69            | 0.24            |
| 13 | rs35859249 | TBC1D1  | 0.39 (0.32)              | -0.44 (0.31) | 0.16            | 0.83            | 1.04 (0.89)              | -1.07 (0.76) | 0.15            | 2.10            | 0.07 (0.42)                               | -0.09 (0.35) | 0.15            | 0.16            |
| 14 | rs4832743  | TBC1D1  | 0.06 (0.18)              | -0.04 (0.17) | 0.87            | 0.10            | -0.32 (0.50)             | -0.15 (0.42) | 0.57            | -0.17           | -0.46 (0.23)                              | -0.06 (0.19) | 0.57            | -0.40           |
| 15 | rs10517456 | TBC1D1  | 0.00 (0.17)              | -0.06 (0.17) | 0.73            | 0.06            | 0.13 (0.47)              | 0.24 (0.42)  | 0.95            | -0.11           | 0.12 (0.22)                               | 0.37 (0.19)  | 0.95            | -0.25           |
| 16 | rs9999507  | TBC1D1  | 0.26 (0.17)              | -0.18 (0.16) | 0.09            | 0.44            | 0.25 (0.47)              | -0.50 (0.41) | 0.30            | 0.75            | -0.39 (0.22)                              | -0.10 (0.19) | 0.30            | -0.29           |
| 17 | rs6845120  | TBC1D1  | 0.32 (0.18)              | -0.12 (0.18) | 0.11            | 0.44            | 0.39 (0.51)              | -0.44 (0.46) | 0.26            | 0.83            | -0.40 (0.24)                              | -0.16 (0.21) | 0.26            | -0.24           |
| 18 | rs6823014  | TBC1D1  | -0.33 (0.17)             | -0.07 (0.17) | 0.29            | -0.27           | -0.35 (0.47)             | -0.09 (0.42) | 0.67            | -0.26           | 0.47 (0.22)                               | 0.05 (0.19)  | 0.67            | 0.42            |
| 19 | rs10009706 | TBC1D1  | 0.31 (0.19)              | -0.15 (0.19) | 0.12            | 0.45            | 0.40 (0.52)              | -0.37 (0.48) | 0.30            | 0.77            | -0.37 (0.24)                              | -0.04 (0.22) | 0.30            | -0.33           |
| 20 | rs2303422  | TBC1D1  | 0.30 (0.23)              | -0.05 (0.23) | 0.21            | 0.35            | 0.51 (0.65)              | -0.44 (0.57) | 0.19            | 0.95            | -0.23 (0.30)                              | -0.32 (0.26) | 0.19            | 0.09            |
| 21 | rs1344603  | TBC1D1  | -0.04 (0.18)             | 0.06 (0.18)  | 0.65            | -0.10           | 0.26 (0.51)              | 0.15 (0.44)  | 0.87            | 0.12            | 0.37 (0.24)                               | 0.02 (0.20)  | 0.87            | 0.35            |
| 22 | rs637797   | TBC1D1  | 0.07 (0.18)              | -0.52 (0.18) | 0.04            | 0.59            | -0.06 (0.51)             | -1.18 (0.45) | 0.16            | 1.13            | -0.22 (0.24)                              | -0.04 (0.21) | 0.16            | -0.19           |
| 23 | rs6837834  | TBC1D1  | 0.11 (0.24)              | 0.19 (0.26)  | 0.97            | -0.08           | -0.10 (0.68)             | 0.52 (0.65)  | 0.66            | -0.63           | -0.38 (0.32)                              | 0.10 (0.30)  | 0.66            | -0.48           |
| 24 | rs13110318 | TBC1D1  | -0.27 (0.30)             | -0.11 (0.31) | 0.56            | -0.16           | -0.48 (0.86)             | -0.45 (0.77) | 0.73            | -0.03           | 0.19 (0.40)                               | -0.20 (0.35) | 0.73            | 0.40            |
| 25 | rs3816873  | MTTP    | -0.13 (0.19)             | -0.02 (0.19) | 0.81            | -0.11           | -0.26 (0.53)             | -0.01 (0.47) | 0.84            | -0.25           | 0.07 (0.25)                               | 0.04 (0.22)  | 0.84            | 0.03            |
| 26 | rs1799883  | FABP2   | -0.10 (0.19)             | -0.34 (0.19) | 0.29            | 0.24            | 0.07 (0.53)              | -0.70 (0.48) | 0.22            | 0.76            | 0.32 (0.25)                               | 0.06 (0.22)  | 0.22            | 0.26            |
| 27 | rs6857641  | FABP2   | -0.06 (0.16)             | -0.26 (0.17) | 0.42            | 0.20            | -0.05 (0.46)             | -0.69 (0.42) | 0.35            | 0.64            | 0.11 (0.21)                               | -0.11 (0.19) | 0.35            | 0.22            |
| 28 | rs13283456 | PTGES2  | -0.02 (0.22)             | 0.24 (0.22)  | 0.32            | -0.26           | 0.13 (0.61)              | 0.55 (0.55)  | 0.52            | -0.42           | 0.18 (0.28)                               | 0.01 (0.25)  | 0.52            | 0.17            |
| 29 | rs7903146  | TCF7L2  | -0.09 (0.18)             | -0.17 (0.19) | 0.86            | 0.08            | -0.06 (0.52)             | -0.63 (0.48) | 0.40            | 0.57            | 0.17 (0.24)                               | -0.25 (0.22) | 0.40            | 0.42            |
| 30 | rs916829   | ABCC8   | -0.12 (0.22)             | -0.33 (0.24) | 0.62            | 0.22            | -0.35 (0.62)             | -0.40 (0.59) | 0.95            | 0.05            | -0.05 (0.29)                              | 0.34 (0.27)  | 0.95            | -0.39           |
| 31 | rs916828   | ABCC8   | -0.02 (0.19)             | -0.12 (0.19) | 0.97            | 0.10            | 0.25 (0.54)              | -0.16 (0.47) | 0.81            | 0.41            | 0.30 (0.25)                               | 0.10 (0.21)  | 0.81            | 0.20            |
| 32 | rs2237984  | ABCC8   | -0.17 (0.17)             | 0.03 (0.17)  | 0.37            | -0.20           | -0.66 (0.47)             | -0.11 (0.42) | 0.36            | -0.56           | -0.23 (0.22)                              | -0.17 (0.19) | 0.36            | -0.07           |
| 33 | rs10832786 | ABCC8   | 0.08 (0.23)              | 0.35 (0.24)  | 0.52            | -0.26           | -0.18 (0.65)             | 0.26 (0.59)  | 0.70            | -0.45           | -0.39 (0.31)                              | -0.50 (0.27) | 0.70            | 0.11            |
| 34 | rs7106053  | ABCC8   | 0.11 (0.18)              | -0.02 (0.17) | 0.65            | 0.12            | 0.26 (0.50)              | -0.25 (0.43) | 0.46            | 0.51            | 0.00 (0.23)                               | -0.21 (0.20) | 0.46            | 0.21            |
| 35 | rs11024286 | ABCC8   | 0.03 (0.18)              | -0.05 (0.18) | 0.78            | 0.08            | 0.24 (0.52)              | -0.37 (0.44) | 0.39            | 0.60            | 0.16 (0.24)                               | -0.25 (0.20) | 0.39            | 0.41            |
| 36 | rs1520220  | IGF1    | 0.44 (0.21)              | 0.21 (0.22)  | 0.43            | 0.23            | 0.86 (0.60)              | 0.74 (0.53)  | 0.80            | 0.12            | -0.23 (0.28)                              | 0.28 (0.24)  | 0.80            | -0.51           |
| 37 | rs9939609  | FTO     | 0.56 (0.17)              | 0.14 (0.17)  | 0.12            | 0.41            | 1.55 (0.48)              | 0.08 (0.43)  | 0.03            | 1.46            | 0.16 (0.23)                               | -0.24 (0.20) | 0.03            | 0.40            |
| 38 | rs2297508  | SREBF1  | 0.19 (0.17)              | 0.13 (0.17)  | 0.66            | 0.06            | 0.58 (0.49)              | 0.23 (0.43)  | 0.50            | 0.35            | 0.11 (0.23)                               | -0.06 (0.19) | 0.50            | 0.17            |
| 39 | rs1805081  | NPC1    | -0.05 (0.17)             | -0.02 (0.17) | 0.99            | -0.03           | -0.32 (0.48)             | -0.08 (0.42) | 0.83            | -0.24           | -0.20 (0.23)                              | -0.04 (0.19) | 0.83            | -0.17           |
| 40 | rs17700144 | MC4R    | 0.17 (0.20)              | 0.60 (0.20)  | 0.12            | -0.43           | 0.77 (0.57)              | 1.44 (0.50)  | 0.34            | -0.66           | 0.36 (0.27)                               | 0.11 (0.23)  | 0.34            | 0.24            |
| 41 | rs10871777 | MC4R    | 0.13 (0.19)              | 0.51 (0.19)  | 0.16            | -0.38           | 0.68 (0.54)              | 1.16 (0.48)  | 0.49            | -0.48           | 0.37 (0.25)                               | 0.04 (0.22)  | 0.49            | 0.33            |

Multiple linear regression model for body mass index (BMI) and waist circumference (WC) based on adjustment for sex, age, education, occupational activity smoking, alcohol intake, energy intake, fat intake, and fruit and vegetable intake. SNPs are coded as 0, 1, 2 for minor allele count.
