# Supplementary material for: Evaluation of 41 Candidate Gene Variants for Obesity in the EPIC-Potsdam Cohort by Multi-Locus Stepwise Regression
Source: PubMed Central journal article supplement (PMC3709896; doi:10.1371/journal.pone.0068941), 2013-07-12
Supplement: pone.0068941.s007.pdf [file pone.0068941.s007.pdf]

**Table S5: Mean p-values of selected SNP patterns in each step of the multi-locus stepwise regression (MSR) with 41 SNPs on Body-mass index (BMI, kg/m<sup>2</sup>), waist circumference (WC, cm) not adjusted and adjusted for BMI in the EPIC-Potsdam subsample (n=2,122).**

| <b>SNPs at a time</b> | <b>BMI</b> | <b>WC</b> | <b>WC adj. BMI</b> |
|-----------------------|------------|-----------|--------------------|
| 2                     | 2.62E-02   | 2.34E-02  | 2.82E-02           |
| 3                     | 4.62E-03   | 4.37E-03  | 7.09E-03           |
| 4                     | 5.43E-04   | 5.67E-04  | -                  |
| 5                     | 6.49E-05   | 3.94E-05  | -                  |
| 6                     | 7.71E-06   | 8.78E-06  | -                  |
