# Supplementary material for: Evaluation of 41 Candidate Gene Variants for Obesity in the EPIC-Potsdam Cohort by Multi-Locus Stepwise Regression
Source: PubMed Central journal article supplement (PMC3709896; doi:10.1371/journal.pone.0068941), 2013-07-12
Supplement: pone.0068941.s008.pdf [file pone.0068941.s008.pdf]

**Table S6: Result of Multi-locus stepwise regression with 41 SNPs on BMI (kg/m<sup>2</sup>) in the EPIC-Potsdam subsample (n=2,122). Starting with SNP-pairs one SNP at a time was added to the 'best' patterns in the interim step. Selection criterion in every step was a decrease of corrected AIC (AICc, lower values are better) and a global p value below a given threshold (2-SNPs: 0.05, 3- and more SNPs: 1/10<sup>i</sup>-1, where i denote the number of simultaneously analyzed SNPs in each step). SNP numbers correspond to identification number in Table 2 of the main text.**

| SNP 1                   | SNP 2 | SNP 3 | SNP 4 | SNP 5 | SNP 6 | Global p-value | AICc     |
|-------------------------|-------|-------|-------|-------|-------|----------------|----------|
| <b>2 SNPs at a time</b> |       |       |       |       |       |                |          |
| 33                      | 40    |       |       |       |       | 9.10E-04       | 11847.53 |
| 22                      | 40    |       |       |       |       | 1.78E-03       | 11848.52 |
| 37                      | 40    |       |       |       |       | 2.48E-03       | 11849.23 |
| 15                      | 18    |       |       |       |       | 3.02E-03       | 11849.66 |
| 33                      | 41    |       |       |       |       | 4.59E-03       | 11850.80 |
| 37                      | 41    |       |       |       |       | 4.61E-03       | 11850.57 |
| 22                      | 41    |       |       |       |       | 5.19E-03       | 11850.83 |
| 40                      | 41    |       |       |       |       | 6.16E-03       | 11852.06 |
| 29                      | 40    |       |       |       |       | 6.65E-03       | 11851.55 |
| 18                      | 40    |       |       |       |       | 7.46E-03       | 11851.62 |
| 26                      | 37    |       |       |       |       | 7.72E-03       | 11851.69 |
| 11                      | 40    |       |       |       |       | 8.31E-03       | 11852.00 |
| 30                      | 31    |       |       |       |       | 8.78E-03       | 11851.97 |
| 30                      | 40    |       |       |       |       | 9.46E-03       | 11852.26 |
| 27                      | 40    |       |       |       |       | 9.67E-03       | 11852.18 |
| 26                      | 40    |       |       |       |       | 9.70E-03       | 11852.19 |
| 18                      | 41    |       |       |       |       | 9.77E-03       | 11852.21 |
| 22                      | 27    |       |       |       |       | 1.06E-02       | 11852.38 |
| 39                      | 40    |       |       |       |       | 1.06E-02       | 11852.39 |
| 22                      | 37    |       |       |       |       | 1.13E-02       | 11852.53 |
| 24                      | 40    |       |       |       |       | 1.14E-02       | 11852.63 |
| 20                      | 22    |       |       |       |       | 1.28E-02       | 11852.87 |
| 13                      | 40    |       |       |       |       | 1.33E-02       | 11852.95 |
| 22                      | 33    |       |       |       |       | 1.36E-02       | 11852.99 |
| 38                      | 40    |       |       |       |       | 1.40E-02       | 11852.99 |
| 34                      | 40    |       |       |       |       | 1.48E-02       | 11853.11 |
| 23                      | 40    |       |       |       |       | 1.49E-02       | 11853.19 |
| 19                      | 41    |       |       |       |       | 1.51E-02       | 11853.16 |
| 6                       | 40    |       |       |       |       | 1.56E-02       | 11853.27 |
| 11                      | 22    |       |       |       |       | 1.57E-02       | 11853.29 |
| 5                       | 40    |       |       |       |       | 1.63E-02       | 11853.36 |
| 6                       | 37    |       |       |       |       | 1.67E-02       | 11853.42 |
| 22                      | 26    |       |       |       |       | 1.74E-02       | 11853.48 |
| 4                       | 22    |       |       |       |       | 1.96E-02       | 11853.73 |
| 29                      | 41    |       |       |       |       | 1.96E-02       | 11853.74 |
| 19                      | 40    |       |       |       |       | 2.03E-02       | 11853.82 |
| 32                      | 40    |       |       |       |       | 2.04E-02       | 11853.83 |
| 1                       | 40    |       |       |       |       | 2.04E-02       | 11853.83 |
| 22                      | 36    |       |       |       |       | 2.16E-02       | 11853.95 |
| 18                      | 22    |       |       |       |       | 2.25E-02       | 11854.04 |
| 30                      | 41    |       |       |       |       | 2.31E-02       | 11854.06 |
| 11                      | 41    |       |       |       |       | 2.31E-02       | 11854.06 |
| 4                       | 40    |       |       |       |       | 2.33E-02       | 11854.09 |
| 14                      | 40    |       |       |       |       | 2.36E-02       | 11854.15 |
| 15                      | 40    |       |       |       |       | 2.42E-02       | 11854.21 |

| SNP 1                   | SNP 2 | SNP 3 | SNP 4 | SNP 5 | SNP 6 | Global<br>p-value | AICc     |
|-------------------------|-------|-------|-------|-------|-------|-------------------|----------|
| 27                      | 37    |       |       |       |       | 2.51E-02          | 11854.28 |
| 25                      | 40    |       |       |       |       | 2.57E-02          | 11854.34 |
| 3                       | 40    |       |       |       |       | 2.59E-02          | 11854.30 |
| 15                      | 36    |       |       |       |       | 2.60E-02          | 11854.36 |
| 8                       | 40    |       |       |       |       | 2.60E-02          | 11854.37 |
| 1                       | 36    |       |       |       |       | 2.75E-02          | 11854.42 |
| 22                      | 38    |       |       |       |       | 2.90E-02          | 11854.61 |
| 18                      | 37    |       |       |       |       | 2.90E-02          | 11854.61 |
| 26                      | 41    |       |       |       |       | 2.96E-02          | 11854.65 |
| 24                      | 41    |       |       |       |       | 3.08E-02          | 11854.65 |
| 17                      | 41    |       |       |       |       | 3.29E-02          | 11854.89 |
| 27                      | 41    |       |       |       |       | 3.31E-02          | 11854.90 |
| 21                      | 22    |       |       |       |       | 3.41E-02          | 11854.85 |
| 3                       | 22    |       |       |       |       | 3.43E-02          | 11854.87 |
| 36                      | 37    |       |       |       |       | 3.46E-02          | 11855.00 |
| 17                      | 22    |       |       |       |       | 3.52E-02          | 11855.03 |
| 24                      | 37    |       |       |       |       | 3.79E-02          | 11855.07 |
| 22                      | 29    |       |       |       |       | 3.87E-02          | 11855.25 |
| 6                       | 41    |       |       |       |       | 3.97E-02          | 11855.16 |
| 22                      | 39    |       |       |       |       | 3.97E-02          | 11855.31 |
| 17                      | 40    |       |       |       |       | 4.04E-02          | 11855.34 |
| 28                      | 40    |       |       |       |       | 4.06E-02          | 11855.21 |
| 13                      | 41    |       |       |       |       | 4.08E-02          | 11855.22 |
| 38                      | 41    |       |       |       |       | 4.17E-02          | 11855.42 |
| 21                      | 40    |       |       |       |       | 4.17E-02          | 11855.42 |
| 30                      | 37    |       |       |       |       | 4.18E-02          | 11855.42 |
| 29                      | 37    |       |       |       |       | 4.19E-02          | 11855.43 |
| 8                       | 22    |       |       |       |       | 4.28E-02          | 11855.48 |
| 2                       | 40    |       |       |       |       | 4.31E-02          | 11855.49 |
| 26                      | 36    |       |       |       |       | 4.35E-02          | 11855.34 |
| 1                       | 22    |       |       |       |       | 4.37E-02          | 11855.52 |
| 31                      | 40    |       |       |       |       | 4.39E-02          | 11855.53 |
| 22                      | 23    |       |       |       |       | 4.40E-02          | 11855.37 |
| 16                      | 40    |       |       |       |       | 4.41E-02          | 11855.55 |
| 12                      | 40    |       |       |       |       | 4.44E-02          | 11855.56 |
| 12                      | 14    |       |       |       |       | 4.46E-02          | 11855.57 |
| 4                       | 37    |       |       |       |       | 4.51E-02          | 11855.59 |
| 22                      | 28    |       |       |       |       | 4.63E-02          | 11855.65 |
| 5                       | 37    |       |       |       |       | 4.70E-02          | 11855.50 |
| 9                       | 40    |       |       |       |       | 4.75E-02          | 11855.71 |
| 22                      | 24    |       |       |       |       | 4.78E-02          | 11855.54 |
| 4                       | 41    |       |       |       |       | 4.78E-02          | 11855.54 |
| 7                       | 40    |       |       |       |       | 4.81E-02          | 11855.55 |
| 5                       | 41    |       |       |       |       | 4.88E-02          | 11855.58 |
| 7                       | 29    |       |       |       |       | 4.98E-02          | 11855.62 |
| 35                      | 40    |       |       |       |       | 4.99E-02          | 11855.82 |
| <b>3 SNPs at a time</b> |       |       |       |       |       |                   |          |
| 15                      | 18    | 40    |       |       |       | 1.94E-04          | 11843.25 |
| 15                      | 18    | 36    |       |       |       | 3.84E-04          | 11844.85 |
| 15                      | 18    | 22    |       |       |       | 7.60E-04          | 11846.63 |
| 22                      | 33    | 40    |       |       |       | 8.24E-04          | 11846.62 |
| 22                      | 26    | 40    |       |       |       | 8.90E-04          | 11846.80 |
| 26                      | 37    | 40    |       |       |       | 9.15E-04          | 11846.93 |
| 22                      | 27    | 40    |       |       |       | 1.01E-03          | 11847.18 |

| SNP 1 | SNP 2 | SNP 3 | SNP 4 | SNP 5 | SNP 6 | Global<br>p-value | AICc     |
|-------|-------|-------|-------|-------|-------|-------------------|----------|
| 15    | 18    | 41    |       |       |       | 1.02E-03          | 11847.36 |
| 15    | 33    | 40    |       |       |       | 1.05E-03          | 11847.19 |
| 22    | 37    | 40    |       |       |       | 1.33E-03          | 11847.84 |
| 26    | 36    | 37    |       |       |       | 1.40E-03          | 11847.85 |
| 26    | 37    | 41    |       |       |       | 1.78E-03          | 11848.54 |
| 27    | 37    | 40    |       |       |       | 1.80E-03          | 11848.58 |
| 6     | 7     | 29    |       |       |       | 2.11E-03          | 11848.78 |
| 37    | 40    | 41    |       |       |       | 2.13E-03          | 11848.90 |
| 8     | 15    | 36    |       |       |       | 2.17E-03          | 11849.04 |
| 15    | 18    | 37    |       |       |       | 2.38E-03          | 11849.49 |
| 30    | 37    | 41    |       |       |       | 2.42E-03          | 11849.15 |
| 29    | 37    | 40    |       |       |       | 2.50E-03          | 11849.22 |
| 15    | 18    | 30    |       |       |       | 2.55E-03          | 11849.21 |
| 13    | 15    | 18    |       |       |       | 2.66E-03          | 11849.31 |
| 30    | 31    | 40    |       |       |       | 2.84E-03          | 11849.46 |
| 22    | 37    | 41    |       |       |       | 2.90E-03          | 11849.75 |
| 15    | 17    | 22    |       |       |       | 3.10E-03          | 11849.92 |
| 22    | 33    | 41    |       |       |       | 3.23E-03          | 11849.83 |
| 26    | 38    | 40    |       |       |       | 3.28E-03          | 11850.05 |
| 9     | 36    | 40    |       |       |       | 3.58E-03          | 11850.07 |
| 11    | 22    | 27    |       |       |       | 3.84E-03          | 11850.24 |
| 15    | 36    | 37    |       |       |       | 4.00E-03          | 11850.34 |
| 7     | 29    | 40    |       |       |       | 4.02E-03          | 11850.25 |
| 23    | 30    | 31    |       |       |       | 4.08E-03          | 11850.28 |
| 22    | 26    | 41    |       |       |       | 4.47E-03          | 11850.61 |
| 18    | 30    | 31    |       |       |       | 4.61E-03          | 11850.68 |
| 34    | 35    | 40    |       |       |       | 4.64E-03          | 11850.57 |
| 6     | 29    | 41    |       |       |       | 4.66E-03          | 11850.71 |
| 1     | 27    | 40    |       |       |       | 4.81E-03          | 11851.01 |
| 30    | 31    | 36    |       |       |       | 4.96E-03          | 11850.73 |
| 4     | 7     | 29    |       |       |       | 5.01E-03          | 11850.75 |
| 15    | 16    | 36    |       |       |       | 5.16E-03          | 11851.18 |
| 15    | 39    | 40    |       |       |       | 5.27E-03          | 11851.23 |
| 20    | 26    | 37    |       |       |       | 5.28E-03          | 11851.01 |
| 21    | 22    | 35    |       |       |       | 5.43E-03          | 11851.07 |
| 18    | 27    | 40    |       |       |       | 5.62E-03          | 11851.39 |
| 15    | 19    | 40    |       |       |       | 5.80E-03          | 11851.47 |
| 27    | 36    | 37    |       |       |       | 5.97E-03          | 11851.31 |
| 7     | 11    | 40    |       |       |       | 5.98E-03          | 11851.16 |
| 20    | 22    | 39    |       |       |       | 6.20E-03          | 11851.40 |
| 15    | 19    | 36    |       |       |       | 6.30E-03          | 11851.43 |
| 18    | 40    | 41    |       |       |       | 6.43E-03          | 11851.30 |
| 30    | 31    | 33    |       |       |       | 7.23E-03          | 11851.59 |
| 4     | 7     | 40    |       |       |       | 7.33E-03          | 11851.63 |
| 4     | 30    | 31    |       |       |       | 7.58E-03          | 11851.70 |
| 20    | 22    | 37    |       |       |       | 7.60E-03          | 11851.89 |
| 15    | 19    | 41    |       |       |       | 8.06E-03          | 11852.31 |
| 5     | 30    | 31    |       |       |       | 8.26E-03          | 11851.90 |
| 13    | 39    | 40    |       |       |       | 8.33E-03          | 11851.92 |
| 28    | 36    | 40    |       |       |       | 8.37E-03          | 11851.93 |
| 7     | 30    | 31    |       |       |       | 8.42E-03          | 11851.95 |
| 4     | 11    | 40    |       |       |       | 8.58E-03          | 11851.99 |
| 15    | 16    | 40    |       |       |       | 8.76E-03          | 11852.52 |
| 7     | 31    | 40    |       |       |       | 9.20E-03          | 11852.15 |

| SNP 1                   | SNP 2 | SNP 3 | SNP 4 | SNP 5 | SNP 6 | Global<br>p-value | AICc     |
|-------------------------|-------|-------|-------|-------|-------|-------------------|----------|
| 12                      | 14    | 22    |       |       |       | 9.57E-03          | 11852.75 |
| 12                      | 14    | 25    |       |       |       | 9.75E-03          | 11852.79 |
| 13                      | 36    | 40    |       |       |       | 9.77E-03          | 11852.29 |
| 24                      | 39    | 40    |       |       |       | 9.91E-03          | 11852.33 |
| <b>4 SNPs at a time</b> |       |       |       |       |       |                   |          |
| 26                      | 36    | 37    | 40    |       |       | 9.01E-05          | 11841.45 |
| 4                       | 7     | 11    | 40    |       |       | 1.05E-04          | 11841.88 |
| 22                      | 27    | 33    | 40    |       |       | 1.85E-04          | 11843.13 |
| 27                      | 36    | 37    | 40    |       |       | 1.93E-04          | 11843.23 |
| 15                      | 18    | 36    | 41    |       |       | 2.27E-04          | 11843.65 |
| 22                      | 33    | 37    | 40    |       |       | 2.30E-04          | 11843.64 |
| 13                      | 15    | 18    | 36    |       |       | 2.35E-04          | 11843.69 |
| 15                      | 18    | 35    | 36    |       |       | 2.59E-04          | 11844.11 |
| 27                      | 37    | 38    | 40    |       |       | 2.60E-04          | 11844.12 |
| 20                      | 26    | 36    | 37    |       |       | 2.95E-04          | 11844.23 |
| 14                      | 22    | 37    | 40    |       |       | 3.01E-04          | 11844.49 |
| 4                       | 27    | 37    | 40    |       |       | 3.01E-04          | 11844.30 |
| 11                      | 22    | 27    | 40    |       |       | 3.05E-04          | 11844.38 |
| 11                      | 22    | 33    | 40    |       |       | 3.46E-04          | 11844.62 |
| 22                      | 27    | 37    | 40    |       |       | 3.49E-04          | 11844.86 |
| 24                      | 33    | 39    | 40    |       |       | 3.49E-04          | 11844.64 |
| 15                      | 18    | 29    | 41    |       |       | 3.63E-04          | 11844.81 |
| 14                      | 27    | 37    | 40    |       |       | 3.78E-04          | 11845.06 |
| 26                      | 37    | 39    | 40    |       |       | 3.79E-04          | 11844.91 |
| 20                      | 22    | 39    | 40    |       |       | 3.81E-04          | 11844.92 |
| 20                      | 26    | 37    | 40    |       |       | 3.94E-04          | 11845.01 |
| 6                       | 7     | 29    | 40    |       |       | 4.13E-04          | 11845.02 |
| 6                       | 26    | 37    | 40    |       |       | 4.15E-04          | 11845.04 |
| 27                      | 33    | 37    | 40    |       |       | 4.25E-04          | 11845.09 |
| 22                      | 33    | 39    | 40    |       |       | 4.46E-04          | 11845.31 |
| 13                      | 15    | 18    | 41    |       |       | 4.59E-04          | 11845.28 |
| 26                      | 36    | 37    | 41    |       |       | 4.62E-04          | 11845.40 |
| 12                      | 14    | 22    | 36    |       |       | 4.65E-04          | 11845.41 |
| 6                       | 26    | 37    | 41    |       |       | 5.19E-04          | 11845.57 |
| 4                       | 7     | 29    | 40    |       |       | 5.20E-04          | 11845.55 |
| 6                       | 27    | 37    | 40    |       |       | 5.40E-04          | 11845.64 |
| 18                      | 26    | 37    | 40    |       |       | 5.66E-04          | 11845.78 |
| 15                      | 26    | 37    | 40    |       |       | 5.77E-04          | 11845.83 |
| 27                      | 36    | 37    | 41    |       |       | 6.07E-04          | 11845.95 |
| 6                       | 15    | 18    | 41    |       |       | 6.11E-04          | 11845.96 |
| 26                      | 33    | 37    | 40    |       |       | 6.13E-04          | 11846.09 |
| 22                      | 33    | 37    | 41    |       |       | 6.31E-04          | 11846.04 |
| 21                      | 22    | 33    | 35    |       |       | 6.41E-04          | 11846.08 |
| 4                       | 22    | 27    | 40    |       |       | 6.44E-04          | 11846.21 |
| 18                      | 26    | 36    | 37    |       |       | 6.48E-04          | 11846.11 |
| 23                      | 26    | 37    | 40    |       |       | 6.53E-04          | 11846.12 |
| 11                      | 26    | 37    | 40    |       |       | 6.66E-04          | 11846.17 |
| 30                      | 31    | 33    | 40    |       |       | 6.86E-04          | 11846.19 |
| 17                      | 26    | 37    | 41    |       |       | 6.91E-04          | 11846.26 |
| 27                      | 32    | 37    | 40    |       |       | 7.16E-04          | 11846.48 |
| 8                       | 22    | 33    | 40    |       |       | 7.17E-04          | 11846.35 |
| 11                      | 27    | 37    | 40    |       |       | 7.25E-04          | 11846.32 |
| 14                      | 22    | 37    | 41    |       |       | 7.45E-04          | 11846.77 |
| 5                       | 26    | 37    | 40    |       |       | 7.91E-04          | 11846.58 |

| SNP 1                   | SNP 2 | SNP 3 | SNP 4 | SNP 5 | SNP 6 | Global<br>p-value | AICc     |
|-------------------------|-------|-------|-------|-------|-------|-------------------|----------|
| 16                      | 26    | 37    | 40    |       |       | 7.94E-04          | 11846.59 |
| 7                       | 30    | 31    | 40    |       |       | 8.20E-04          | 11846.61 |
| 2                       | 26    | 37    | 40    |       |       | 8.20E-04          | 11846.67 |
| 13                      | 15    | 18    | 29    |       |       | 8.30E-04          | 11846.84 |
| 12                      | 22    | 37    | 40    |       |       | 8.49E-04          | 11847.11 |
| 1                       | 27    | 33    | 40    |       |       | 8.85E-04          | 11846.85 |
| 13                      | 15    | 18    | 30    |       |       | 8.92E-04          | 11846.84 |
| 26                      | 29    | 37    | 41    |       |       | 9.20E-04          | 11847.10 |
| 16                      | 22    | 37    | 40    |       |       | 9.33E-04          | 11847.13 |
| 6                       | 26    | 36    | 37    |       |       | 9.40E-04          | 11847.00 |
| 11                      | 15    | 33    | 40    |       |       | 9.62E-04          | 11847.06 |
| 6                       | 30    | 37    | 41    |       |       | 9.83E-04          | 11847.03 |
| <b>5 SNPs at a time</b> |       |       |       |       |       |                   |          |
| 11                      | 26    | 33    | 37    | 40    |       | 3.45E-05          | 11839.67 |
| 13                      | 15    | 18    | 29    | 31    |       | 3.68E-05          | 11839.37 |
| 4                       | 27    | 36    | 37    | 40    |       | 3.71E-05          | 11839.83 |
| 11                      | 23    | 26    | 37    | 40    |       | 3.76E-05          | 11839.86 |
| 11                      | 22    | 33    | 37    | 40    |       | 5.18E-05          | 11840.30 |
| 4                       | 22    | 27    | 33    | 40    |       | 5.81E-05          | 11840.55 |
| 7                       | 13    | 15    | 18    | 29    |       | 5.86E-05          | 11840.44 |
| 23                      | 26    | 33    | 37    | 40    |       | 6.32E-05          | 11840.74 |
| 1                       | 13    | 15    | 18    | 29    |       | 6.50E-05          | 11840.68 |
| 6                       | 26    | 36    | 37    | 40    |       | 6.62E-05          | 11840.73 |
| 6                       | 27    | 36    | 37    | 40    |       | 6.86E-05          | 11841.17 |
| 17                      | 26    | 36    | 37    | 40    |       | 7.07E-05          | 11840.88 |
| 26                      | 33    | 36    | 37    | 40    |       | 7.10E-05          | 11841.01 |
| 4                       | 27    | 33    | 37    | 40    |       | 7.13E-05          | 11841.26 |
| 4                       | 26    | 36    | 37    | 41    |       | 7.35E-05          | 11841.08 |
| 6                       | 26    | 36    | 37    | 41    |       | 7.56E-05          | 11841.03 |
| 4                       | 26    | 36    | 37    | 40    |       | 7.65E-05          | 11841.18 |
| 23                      | 26    | 36    | 37    | 40    |       | 8.60E-05          | 11841.34 |
| 3                       | 15    | 18    | 35    | 36    |       | 9.58E-05          | 11841.58 |
| 6                       | 11    | 26    | 37    | 40    |       | 9.91E-05          | 11841.98 |
| <b>6 SNPs at a time</b> |       |       |       |       |       |                   |          |
| 4                       | 19    | 26    | 36    | 37    | 40    | 3.45E-06          | 11834.69 |
| 7                       | 13    | 15    | 18    | 29    | 30    | 6.82E-06          | 11836.16 |
| 7                       | 13    | 15    | 18    | 29    | 31    | 7.53E-06          | 11836.37 |
| 4                       | 19    | 26    | 36    | 37    | 41    | 7.53E-06          | 11836.37 |
| 23                      | 26    | 33    | 36    | 37    | 40    | 8.18E-06          | 11836.55 |
| 1                       | 7     | 13    | 15    | 18    | 29    | 8.21E-06          | 11836.56 |
| 11                      | 23    | 26    | 33    | 37    | 40    | 8.50E-06          | 11836.63 |
| 4                       | 17    | 26    | 36    | 37    | 40    | 9.47E-06          | 11836.49 |
| 1                       | 13    | 15    | 18    | 29    | 38    | 9.70E-06          | 11836.31 |
