# Supplementary material for: Evaluation of 41 Candidate Gene Variants for Obesity in the EPIC-Potsdam Cohort by Multi-Locus Stepwise Regression
Source: PubMed Central journal article supplement (PMC3709896; doi:10.1371/journal.pone.0068941), 2013-07-12
Supplement: pone.0068941.s009.pdf [file pone.0068941.s009.pdf]

**Table S7: Result of Multi-locus stepwise regression with 41 SNPs on waist circumference (cm) in the EPIC-Potsdam subsample (n=2,122). Starting with SNP-pairs one SNP at a time was added to the 'best' patterns in the interim step. Selection criterion in every step was a decrease of corrected AIC (AICc, lower values are better) and a global p value below a given threshold (2-SNPs: 0.05, 3- and more SNPs:  $1/10^{(i-1)}$ , where i denote the number of simultaneously analyzed SNPs in each step). SNP numbers correspond to identification number in Table 2 of the main text.**

| SNP 1                   | SNP 2 | SNP 3 | SNP 4 | SNP 5 | SNP 6 | Global p-value | AICc     |
|-------------------------|-------|-------|-------|-------|-------|----------------|----------|
| <b>2 SNPs at a time</b> |       |       |       |       |       |                |          |
| 40                      | 41    |       |       |       |       | 3.27E-03       | 15868.95 |
| 1                       | 40    |       |       |       |       | 3.62E-03       | 15868.09 |
| 22                      | 41    |       |       |       |       | 3.72E-03       | 15868.15 |
| 37                      | 40    |       |       |       |       | 4.77E-03       | 15868.69 |
| 11                      | 40    |       |       |       |       | 4.81E-03       | 15868.94 |
| 33                      | 40    |       |       |       |       | 4.99E-03       | 15869.01 |
| 19                      | 41    |       |       |       |       | 5.44E-03       | 15868.98 |
| 19                      | 40    |       |       |       |       | 5.59E-03       | 15869.04 |
| 26                      | 37    |       |       |       |       | 5.84E-03       | 15869.13 |
| 18                      | 40    |       |       |       |       | 6.60E-03       | 15869.40 |
| 24                      | 40    |       |       |       |       | 6.62E-03       | 15869.59 |
| 23                      | 40    |       |       |       |       | 6.95E-03       | 15869.68 |
| 29                      | 40    |       |       |       |       | 7.15E-03       | 15869.74 |
| 4                       | 40    |       |       |       |       | 7.69E-03       | 15869.89 |
| 5                       | 40    |       |       |       |       | 7.81E-03       | 15869.92 |
| 18                      | 41    |       |       |       |       | 8.04E-03       | 15869.83 |
| 17                      | 41    |       |       |       |       | 8.93E-03       | 15870.05 |
| 39                      | 40    |       |       |       |       | 9.91E-03       | 15870.28 |
| 4                       | 22    |       |       |       |       | 9.95E-03       | 15870.41 |
| 30                      | 40    |       |       |       |       | 1.01E-02       | 15870.45 |
| 27                      | 40    |       |       |       |       | 1.02E-02       | 15870.34 |
| 11                      | 22    |       |       |       |       | 1.03E-02       | 15870.49 |
| 13                      | 40    |       |       |       |       | 1.04E-02       | 15870.49 |
| 22                      | 36    |       |       |       |       | 1.05E-02       | 15870.40 |
| 6                       | 40    |       |       |       |       | 1.06E-02       | 15870.53 |
| 1                       | 41    |       |       |       |       | 1.07E-02       | 15870.45 |
| 17                      | 40    |       |       |       |       | 1.21E-02       | 15870.72 |
| 8                       | 40    |       |       |       |       | 1.24E-02       | 15870.77 |
| 15                      | 18    |       |       |       |       | 1.33E-02       | 15870.92 |
| 38                      | 40    |       |       |       |       | 1.38E-02       | 15871.00 |
| 2                       | 40    |       |       |       |       | 1.40E-02       | 15871.04 |
| 21                      | 36    |       |       |       |       | 1.45E-02       | 15871.11 |
| 34                      | 40    |       |       |       |       | 1.46E-02       | 15871.13 |
| 4                       | 41    |       |       |       |       | 1.47E-02       | 15871.20 |
| 32                      | 40    |       |       |       |       | 1.52E-02       | 15871.22 |
| 37                      | 41    |       |       |       |       | 1.62E-02       | 15871.36 |
| 33                      | 41    |       |       |       |       | 1.72E-02       | 15871.52 |
| 30                      | 31    |       |       |       |       | 1.93E-02       | 15871.75 |
| 11                      | 41    |       |       |       |       | 1.94E-02       | 15871.76 |
| 1                       | 36    |       |       |       |       | 1.96E-02       | 15871.78 |
| 26                      | 40    |       |       |       |       | 2.01E-02       | 15871.84 |
| 1                       | 22    |       |       |       |       | 2.01E-02       | 15871.84 |
| 25                      | 40    |       |       |       |       | 2.03E-02       | 15871.86 |

| SNP 1                   | SNP 2 | SNP 3 | SNP 4 | SNP 5 | SNP 6 | Global<br>p-value | AICc     |
|-------------------------|-------|-------|-------|-------|-------|-------------------|----------|
| 20                      | 22    |       |       |       |       | 2.03E-02          | 15871.85 |
| 8                       | 22    |       |       |       |       | 2.06E-02          | 15871.89 |
| 24                      | 41    |       |       |       |       | 2.06E-02          | 15871.88 |
| 22                      | 37    |       |       |       |       | 2.29E-02          | 15872.12 |
| 14                      | 40    |       |       |       |       | 2.32E-02          | 15872.15 |
| 21                      | 40    |       |       |       |       | 2.41E-02          | 15872.24 |
| 7                       | 40    |       |       |       |       | 2.45E-02          | 15872.23 |
| 16                      | 40    |       |       |       |       | 2.51E-02          | 15872.33 |
| 15                      | 40    |       |       |       |       | 2.54E-02          | 15872.35 |
| 5                       | 41    |       |       |       |       | 2.72E-02          | 15872.44 |
| 6                       | 41    |       |       |       |       | 2.76E-02          | 15872.47 |
| 35                      | 40    |       |       |       |       | 2.81E-02          | 15872.58 |
| 12                      | 40    |       |       |       |       | 2.82E-02          | 15872.58 |
| 16                      | 36    |       |       |       |       | 2.85E-02          | 15872.61 |
| 22                      | 27    |       |       |       |       | 2.87E-02          | 15872.63 |
| 27                      | 37    |       |       |       |       | 2.93E-02          | 15872.67 |
| 6                       | 22    |       |       |       |       | 3.16E-02          | 15872.74 |
| 3                       | 40    |       |       |       |       | 3.23E-02          | 15872.79 |
| 2                       | 41    |       |       |       |       | 3.25E-02          | 15872.91 |
| 29                      | 41    |       |       |       |       | 3.27E-02          | 15872.91 |
| 31                      | 40    |       |       |       |       | 3.30E-02          | 15872.94 |
| 9                       | 40    |       |       |       |       | 3.45E-02          | 15873.04 |
| 13                      | 41    |       |       |       |       | 3.47E-02          | 15872.93 |
| 10                      | 40    |       |       |       |       | 3.50E-02          | 15873.07 |
| 27                      | 41    |       |       |       |       | 3.50E-02          | 15873.07 |
| 22                      | 39    |       |       |       |       | 3.69E-02          | 15873.19 |
| 39                      | 41    |       |       |       |       | 3.79E-02          | 15873.25 |
| 38                      | 41    |       |       |       |       | 3.82E-02          | 15873.26 |
| 7                       | 29    |       |       |       |       | 4.01E-02          | 15873.22 |
| 30                      | 41    |       |       |       |       | 4.04E-02          | 15873.24 |
| 22                      | 33    |       |       |       |       | 4.06E-02          | 15873.25 |
| 27                      | 36    |       |       |       |       | 4.09E-02          | 15873.42 |
| 22                      | 28    |       |       |       |       | 4.11E-02          | 15873.43 |
| 22                      | 29    |       |       |       |       | 4.11E-02          | 15873.43 |
| 21                      | 22    |       |       |       |       | 4.15E-02          | 15873.29 |
| 22                      | 23    |       |       |       |       | 4.27E-02          | 15873.35 |
| 22                      | 24    |       |       |       |       | 4.31E-02          | 15873.37 |
| 22                      | 38    |       |       |       |       | 4.39E-02          | 15873.58 |
| 14                      | 22    |       |       |       |       | 4.45E-02          | 15873.60 |
| 5                       | 22    |       |       |       |       | 4.45E-02          | 15873.44 |
| 34                      | 41    |       |       |       |       | 4.63E-02          | 15873.70 |
| 3                       | 22    |       |       |       |       | 4.64E-02          | 15873.52 |
| 1                       | 11    |       |       |       |       | 4.67E-02          | 15873.53 |
| 8                       | 41    |       |       |       |       | 4.69E-02          | 15873.73 |
| 8                       | 24    |       |       |       |       | 4.80E-02          | 15873.59 |
| 23                      | 41    |       |       |       |       | 4.81E-02          | 15873.59 |
| 15                      | 22    |       |       |       |       | 4.97E-02          | 15873.85 |
| <b>3 SNPs at a time</b> |       |       |       |       |       |                   |          |
| 27                      | 32    | 37    |       |       |       | 5.26E-04          | 15863.76 |
| 15                      | 18    | 40    |       |       |       | 6.51E-04          | 15864.16 |
| 26                      | 37    | 40    |       |       |       | 1.10E-03          | 15865.42 |
| 1                       | 27    | 40    |       |       |       | 1.60E-03          | 15866.34 |
| 7                       | 29    | 40    |       |       |       | 1.93E-03          | 15866.63 |

| SNP 1                   | SNP 2 | SNP 3 | SNP 4 | SNP 5 | SNP 6 | Global<br>p-value | AICc     |
|-------------------------|-------|-------|-------|-------|-------|-------------------|----------|
| 1                       | 23    | 40    |       |       |       | 1.98E-03          | 15866.68 |
| 26                      | 36    | 37    |       |       |       | 2.00E-03          | 15866.74 |
| 15                      | 18    | 41    |       |       |       | 2.02E-03          | 15867.11 |
| 26                      | 37    | 41    |       |       |       | 2.62E-03          | 15867.54 |
| 4                       | 11    | 40    |       |       |       | 2.72E-03          | 15867.40 |
| 15                      | 18    | 36    |       |       |       | 2.81E-03          | 15867.71 |
| 15                      | 18    | 22    |       |       |       | 2.87E-03          | 15868.01 |
| 19                      | 40    | 41    |       |       |       | 3.07E-03          | 15867.74 |
| 1                       | 40    | 41    |       |       |       | 3.10E-03          | 15867.76 |
| 18                      | 30    | 31    |       |       |       | 3.15E-03          | 15867.82 |
| 4                       | 7     | 40    |       |       |       | 3.22E-03          | 15867.79 |
| 1                       | 22    | 41    |       |       |       | 3.23E-03          | 15868.06 |
| 1                       | 11    | 40    |       |       |       | 3.27E-03          | 15867.82 |
| 27                      | 32    | 36    |       |       |       | 3.32E-03          | 15867.94 |
| 21                      | 36    | 40    |       |       |       | 3.40E-03          | 15868.00 |
| 18                      | 40    | 41    |       |       |       | 3.45E-03          | 15867.99 |
| 37                      | 39    | 40    |       |       |       | 3.78E-03          | 15868.25 |
| 15                      | 33    | 40    |       |       |       | 3.78E-03          | 15868.25 |
| 7                       | 11    | 40    |       |       |       | 3.85E-03          | 15868.19 |
| 18                      | 23    | 40    |       |       |       | 3.98E-03          | 15868.27 |
| 19                      | 25    | 40    |       |       |       | 4.18E-03          | 15868.49 |
| 21                      | 36    | 41    |       |       |       | 4.41E-03          | 15868.62 |
| 19                      | 24    | 41    |       |       |       | 4.47E-03          | 15868.53 |
| 5                       | 18    | 40    |       |       |       | 4.64E-03          | 15868.62 |
| 37                      | 40    | 41    |       |       |       | 4.69E-03          | 15868.65 |
| 1                       | 27    | 41    |       |       |       | 4.74E-03          | 15869.01 |
| 11                      | 36    | 40    |       |       |       | 4.98E-03          | 15868.78 |
| 4                       | 36    | 40    |       |       |       | 5.33E-03          | 15868.93 |
| 5                       | 18    | 41    |       |       |       | 5.34E-03          | 15868.94 |
| 4                       | 28    | 40    |       |       |       | 6.83E-03          | 15869.51 |
| 9                       | 36    | 40    |       |       |       | 6.99E-03          | 15869.73 |
| 30                      | 31    | 40    |       |       |       | 7.21E-03          | 15869.63 |
| 21                      | 22    | 36    |       |       |       | 7.24E-03          | 15869.81 |
| 27                      | 36    | 37    |       |       |       | 7.33E-03          | 15869.85 |
| 15                      | 18    | 30    |       |       |       | 7.35E-03          | 15869.68 |
| 5                       | 17    | 41    |       |       |       | 7.39E-03          | 15869.69 |
| 5                       | 17    | 40    |       |       |       | 7.51E-03          | 15869.73 |
| 6                       | 7     | 29    |       |       |       | 7.90E-03          | 15869.84 |
| 3                       | 7     | 40    |       |       |       | 7.91E-03          | 15869.85 |
| 13                      | 36    | 40    |       |       |       | 8.28E-03          | 15869.95 |
| 16                      | 27    | 41    |       |       |       | 9.03E-03          | 15870.99 |
| <b>4 SNPs at a time</b> |       |       |       |       |       |                   |          |
| 27                      | 32    | 36    | 37    |       |       | 4.05E-05          | 15857.59 |
| 27                      | 32    | 37    | 40    |       |       | 8.03E-05          | 15859.20 |
| 4                       | 7     | 11    | 40    |       |       | 8.28E-05          | 15859.40 |
| 26                      | 36    | 37    | 40    |       |       | 1.49E-04          | 15860.66 |
| 23                      | 27    | 32    | 37    |       |       | 1.84E-04          | 15861.30 |
| 27                      | 32    | 36    | 40    |       |       | 3.62E-04          | 15862.76 |
| 27                      | 32    | 37    | 41    |       |       | 3.79E-04          | 15862.95 |
| 27                      | 36    | 37    | 40    |       |       | 3.88E-04          | 15862.92 |
| 26                      | 37    | 39    | 40    |       |       | 3.98E-04          | 15863.07 |
| 20                      | 26    | 37    | 40    |       |       | 4.05E-04          | 15863.12 |
| 6                       | 7     | 29    | 40    |       |       | 4.28E-04          | 15863.14 |

| SNP 1                   | SNP 2 | SNP 3 | SNP 4 | SNP 5 | SNP 6 | Global<br>p-value | AICc     |
|-------------------------|-------|-------|-------|-------|-------|-------------------|----------|
| 4                       | 22    | 28    | 40    |       |       | 4.44E-04          | 15863.23 |
| 4                       | 28    | 36    | 40    |       |       | 5.23E-04          | 15863.61 |
| 15                      | 18    | 36    | 41    |       |       | 5.34E-04          | 15863.66 |
| 4                       | 7     | 29    | 40    |       |       | 5.39E-04          | 15863.68 |
| 11                      | 26    | 37    | 40    |       |       | 5.47E-04          | 15863.74 |
| 16                      | 26    | 37    | 40    |       |       | 6.28E-04          | 15864.07 |
| 10                      | 26    | 37    | 40    |       |       | 6.58E-04          | 15864.31 |
| 1                       | 27    | 33    | 40    |       |       | 6.61E-04          | 15864.20 |
| 5                       | 26    | 37    | 40    |       |       | 6.80E-04          | 15864.26 |
| 26                      | 36    | 37    | 41    |       |       | 7.56E-04          | 15864.66 |
| 1                       | 11    | 22    | 40    |       |       | 8.40E-04          | 15864.77 |
| 20                      | 26    | 36    | 37    |       |       | 9.24E-04          | 15865.00 |
| 1                       | 26    | 37    | 40    |       |       | 9.43E-04          | 15865.20 |
| 15                      | 18    | 29    | 41    |       |       | 9.53E-04          | 15865.23 |
| 4                       | 11    | 36    | 40    |       |       | 9.54E-04          | 15865.00 |
| 9                       | 36    | 38    | 40    |       |       | 9.74E-04          | 15865.13 |
| 15                      | 26    | 37    | 40    |       |       | 9.84E-04          | 15865.15 |
| 6                       | 26    | 37    | 40    |       |       | 9.95E-04          | 15865.18 |
| <b>5 SNPs at a time</b> |       |       |       |       |       |                   |          |
| 27                      | 32    | 36    | 37    | 40    |       | 1.14E-05          | 15854.59 |
| 4                       | 27    | 32    | 36    | 40    |       | 2.55E-05          | 15857.06 |
| 26                      | 32    | 36    | 37    | 40    |       | 3.10E-05          | 15857.19 |
| 23                      | 27    | 32    | 36    | 37    |       | 3.25E-05          | 15857.06 |
| 4                       | 27    | 32    | 37    | 40    |       | 4.79E-05          | 15857.97 |
| 4                       | 27    | 36    | 37    | 40    |       | 5.84E-05          | 15858.86 |
| 23                      | 27    | 32    | 37    | 40    |       | 6.90E-05          | 15858.84 |
| <b>6 SNPs at a time</b> |       |       |       |       |       |                   |          |
| 23                      | 27    | 32    | 36    | 37    | 40    | 7.80E-06          | 15853.71 |
| 4                       | 27    | 32    | 36    | 37    | 40    | 9.76E-06          | 15854.23 |
