# Supplementary material for: Evaluation of 41 Candidate Gene Variants for Obesity in the EPIC-Potsdam Cohort by Multi-Locus Stepwise Regression
Source: PubMed Central journal article supplement (PMC3709896; doi:10.1371/journal.pone.0068941), 2013-07-12
Supplement: pone.0068941.s010.pdf [file pone.0068941.s010.pdf]

**Table S8: Result of Multi-locus stepwise regression with 41 SNPs on waist circumference (cm) adjusted for BMI in the EPIC-Potsdam subsample (n=2,122). Starting with SNP-pairs one SNP at a time was added to the ‘best’ patterns in the interim step. Selection criterion in every step was a decrease of corrected AIC (AICc, lower values are better) and a global p value below a given threshold (2-SNPs: 0.05, 3- and more SNPs:  $1/10^{(i-1)}$ , where i denote the number of simultaneously analyzed SNPs in each step). SNP numbers correspond to identification number in Table 2 of the main text.**

| SNP 1                   | SNP 2 | SNP 3 | Global p-value | AICc     |
|-------------------------|-------|-------|----------------|----------|
| <b>2 SNPs at a time</b> |       |       |                |          |
| 26                      | 33    |       | 2.52E-03       | 12591.85 |
| 1                       | 33    |       | 8.38E-03       | 12594.28 |
| 27                      | 33    |       | 9.97E-03       | 12594.51 |
| 15                      | 33    |       | 1.30E-02       | 12595.10 |
| 20                      | 33    |       | 1.46E-02       | 12595.41 |
| 3                       | 33    |       | 2.14E-02       | 12596.17 |
| 16                      | 33    |       | 2.64E-02       | 12596.66 |
| 2                       | 33    |       | 2.94E-02       | 12596.90 |
| 4                       | 33    |       | 3.00E-02       | 12596.86 |
| 33                      | 40    |       | 3.03E-02       | 12596.88 |
| 21                      | 33    |       | 3.44E-02       | 12597.14 |
| 16                      | 30    |       | 3.54E-02       | 12597.31 |
| 1                       | 39    |       | 3.62E-02       | 12597.37 |
| 6                       | 33    |       | 3.77E-02       | 12597.32 |
| 23                      | 33    |       | 4.16E-02       | 12597.52 |
| 5                       | 33    |       | 4.20E-02       | 12597.54 |
| 14                      | 33    |       | 4.48E-02       | 12597.84 |
| 33                      | 41    |       | 4.88E-02       | 12597.84 |
| <b>3 SNPs at a time</b> |       |       |                |          |
| 3                       | 26    | 33    | 3.09E-04       | 12586.74 |
| 5                       | 26    | 33    | 2.78E-03       | 12591.74 |
| 16                      | 30    | 41    | 4.07E-03       | 12592.65 |
| 1                       | 3     | 33    | 4.23E-03       | 12592.63 |
| 3                       | 27    | 33    | 6.53E-03       | 12593.79 |
| 4                       | 15    | 33    | 7.42E-03       | 12594.10 |
| 9                       | 16    | 33    | 7.59E-03       | 12594.15 |
| 1                       | 8     | 39    | 7.88E-03       | 12594.52 |
| 2                       | 15    | 33    | 8.48E-03       | 12594.23 |
| 2                       | 16    | 33    | 9.07E-03       | 12594.38 |
| 16                      | 30    | 40    | 9.30E-03       | 12594.64 |
| 16                      | 33    | 41    | 9.40E-03       | 12594.67 |
| 9                       | 14    | 33    | 9.62E-03       | 12594.73 |
| 7                       | 15    | 33    | 9.84E-03       | 12594.78 |
| 2                       | 17    | 33    | 9.86E-03       | 12594.58 |
