# Supplementary material for: Evaluation of 41 Candidate Gene Variants for Obesity in the EPIC-Potsdam Cohort by Multi-Locus Stepwise Regression
Source: PubMed Central journal article supplement (PMC3709896; doi:10.1371/journal.pone.0068941), 2013-07-12
Supplement: pone.0068941.s011.pdf [file pone.0068941.s011.pdf]

**Table S9: All other associations of the MSR-selected SNP combinations with obesity-related traits (BMI, waist circumference and waist-circumference adjusted for BMI) in 2,122 European middle-aged men and women (random population sample).**

| Outcome<br>global p-value (F test)<br>(permutation p-value) <sup>a</sup> | SNPs <sup>b</sup> | allele<br>combination <sup>c</sup> | Frequency | Beta (SE) <sup>d</sup> | p-value  |
|--------------------------------------------------------------------------|-------------------|------------------------------------|-----------|------------------------|----------|
| <b>BMI (kg/m<sup>2</sup>)</b><br>p= 7.53E-06 (0.515)                     | 7-13-15-18-29-31  | 112111                             | 0.088     | -0.38 (0.28)           | 1.77E-01 |
|                                                                          |                   | 111211                             | 0.097     | -0.08 (0.27)           | 7.78E-01 |
|                                                                          |                   | 111111                             | 0.126     | 0.65 (0.23)            | 3.99E-03 |
|                                                                          |                   | 112211                             | 0.100     | 0.83 (0.27)            | 1.87E-03 |
| <b>BMI (kg/m<sup>2</sup>)</b><br>p= 7.53E-06 (0.515)                     | 4-19-26-36-37-41  | 112111                             | 0.064     | -1.58 (0.33)           | 2.03E-06 |
|                                                                          |                   | 121111                             | 0.060     | -0.60 (0.34)           | 8.00E-02 |
|                                                                          |                   | 111111                             | 0.161     | -0.18 (0.21)           | 3.95E-01 |
|                                                                          |                   | 111121                             | 0.128     | 0.12 (0.23)            | 5.86E-01 |
| <b>BMI (kg/m<sup>2</sup>)</b><br>p= 8.18E-06 (0.545)                     | 23-26-33-36-37-40 | 121111                             | 0.072     | -1.52 (0.30)           | 5.76E-07 |
|                                                                          |                   | 111111                             | 0.213     | -0.26 (0.17)           | 1.41E-01 |
|                                                                          |                   | 111121                             | 0.157     | 0.04 (0.20)            | 8.35E-01 |
|                                                                          |                   | 111112                             | 0.058     | 0.49 (0.33)            | 1.46E-01 |
| <b>BMI (kg/m<sup>2</sup>)</b><br>p= 8.21E-06 (0.545)                     | 1-7-13-15-18-29   | 111211                             | 0.089     | -0.39 (0.27)           | 1.54E-01 |
|                                                                          |                   | 111121                             | 0.100     | -0.10 (0.26)           | 6.98E-01 |
|                                                                          |                   | 111221                             | 0.105     | 0.71 (0.26)            | 6.09E-03 |
|                                                                          |                   | 111111                             | 0.122     | 0.74 (0.23)            | 1.39E-03 |
| <b>BMI (kg/m<sup>2</sup>)</b><br>p= 8.50E-06 (0.545)                     | 11-23-26-33-37-40 | 112111                             | 0.074     | -1.35 (0.30)           | 5.67E-06 |
|                                                                          |                   | 111111                             | 0.226     | -0.42 (0.17)           | 1.32E-02 |
|                                                                          |                   | 111121                             | 0.159     | 0.07 (0.20)            | 7.43E-01 |
|                                                                          |                   | 111112                             | 0.064     | 0.53 (0.31)            | 9.12E-02 |
| <b>BMI (kg/m<sup>2</sup>)</b><br>p= 9.47E-06 (0.570)                     | 4-17-26-36-37-40  | 112111                             | 0.058     | -1.77 (0.36)           | 8.18E-07 |
|                                                                          |                   | 121111                             | 0.070     | -0.48 (0.31)           | 1.24E-01 |
|                                                                          |                   | 111111                             | 0.162     | -0.21 (0.20)           | 3.06E-01 |
|                                                                          |                   | 121121                             | 0.054     | -0.03 (0.37)           | 9.38E-01 |
|                                                                          |                   | 111121                             | 0.125     | 0.12 (0.23)            | 6.13E-01 |
| <b>BMI (kg/m<sup>2</sup>)</b><br>p= 9.70E-06 (0.580)                     | 1-13-15-18-29-38  | 112111                             | 0.069     | -0.43 (0.31)           | 1.67E-01 |
|                                                                          |                   | 111211                             | 0.078     | -0.42 (0.30)           | 1.61E-01 |
|                                                                          |                   | 111111                             | 0.098     | 0.35 (0.27)            | 1.93E-01 |
|                                                                          |                   | 112212                             | 0.052     | 0.59 (0.38)            | 1.19E-01 |
|                                                                          |                   | 112211                             | 0.078     | 0.62 (0.31)            | 4.55E-02 |
|                                                                          |                   | 111112                             | 0.056     | 1.54 (0.38)            | 4.42E-05 |
| <b>WC adj. BMI (cm)</b><br>p= 7.31E-03 (0.990)                           | 16-30-41          | 221                                | 0.057     | -0.43 (0.37)           | 2.49E-01 |
|                                                                          |                   | 211                                | 0.329     | -0.30 (0.16)           | 6.53E-02 |
|                                                                          |                   | 111                                | 0.321     | 0.03 (0.16)            | 8.64E-01 |
|                                                                          |                   | 112                                | 0.102     | 0.05 (0.27)            | 8.64E-01 |
|                                                                          |                   | 212                                | 0.097     | 0.39 (0.28)            | 1.64E-01 |
|                                                                          |                   | 121                                | 0.060     | 1.12 (0.36)            | 2.20E-03 |
| <b>WC adj. BMI (cm)</b><br>p= 4.23E-03 (0.990)                           | 1-3-33            | 112                                | 0.085     | -0.86 (0.29)           | 3.00E-03 |
|                                                                          |                   | 211                                | 0.227     | -0.24 (0.18)           | 1.78E-01 |
|                                                                          |                   | 121                                | 0.142     | 0.09 (0.21)            | 6.64E-01 |
|                                                                          |                   | 111                                | 0.488     | 0.38 (0.15)            | 1.30E-02 |
| <b>WC adj. BMI (cm)</b><br>p= 1.02E-02 (0.990)                           | 3-27-33           | 112                                | 0.063     | -1.17 (0.34)           | 6.34E-04 |
|                                                                          |                   | 122                                | 0.058     | -0.28 (0.36)           | 4.42E-01 |
|                                                                          |                   | 121                                | 0.306     | -0.07 (0.17)           | 6.89E-01 |
|                                                                          |                   | 211                                | 0.085     | -0.02 (0.29)           | 9.55E-01 |
|                                                                          |                   | 111                                | 0.409     | 0.27 (0.15)            | 8.52E-02 |
|                                                                          |                   | 221                                | 0.058     | 0.37 (0.38)            | 3.30E-01 |
| <b>WC adj. BMI (cm)</b><br>p= 1.08E-02 (0.990)                           | 4-15-33           | 122                                | 0.054     | -1.10 (0.38)           | 3.84E-03 |
|                                                                          |                   | 112                                | 0.064     | -0.47 (0.34)           | 1.71E-01 |
|                                                                          |                   | 211                                | 0.076     | -0.18 (0.32)           | 5.66E-01 |
|                                                                          |                   | 111                                | 0.400     | -0.13 (0.16)           | 4.04E-01 |
|                                                                          |                   | 121                                | 0.314     | 0.35 (0.17)            | 3.86E-02 |
|                                                                          |                   | 221                                | 0.068     | 0.72 (0.35)            | 3.84E-02 |
| <b>WC adj. BMI (cm)</b><br>p= 7.59E-03 (0.990)                           | 9-16-33           | 121                                | 0.292     | -0.26 (0.17)           | 1.27E-01 |
|                                                                          |                   | 122                                | 0.052     | -0.15 (0.39)           | 7.10E-01 |
|                                                                          |                   | 221                                | 0.135     | 0.20 (0.24)            | 4.14E-01 |

| Outcome<br>global p-value (F test)<br>(permutation p-value) <sup>a</sup> | SNPs <sup>b</sup> | allele<br>combination <sup>c</sup> | Frequency | Beta (SE) <sup>d</sup> | p-value  |
|--------------------------------------------------------------------------|-------------------|------------------------------------|-----------|------------------------|----------|
|                                                                          |                   | 111                                | 0.294     | 0.24 (0.17)            | 1.63E-01 |
|                                                                          |                   | 211                                | 0.137     | 0.51 (0.24)            | 3.80E-02 |
| <b>WC adj. BMI (cm)</b><br>p= 1.26E-02 (0.990)                           | 1-8-39            | 212                                | 0.068     | -1.26 (0.36)           | 5.88E-04 |
|                                                                          |                   | 121                                | 0.162     | -0.22 (0.23)           | 3.25E-01 |
|                                                                          |                   | 221                                | 0.054     | -0.13 (0.42)           | 7.62E-01 |
|                                                                          |                   | 122                                | 0.114     | 0.04 (0.27)            | 8.79E-01 |
|                                                                          |                   | 211                                | 0.099     | 0.12 (0.29)            | 6.80E-01 |
|                                                                          |                   | 112                                | 0.196     | 0.21 (0.21)            | 3.08E-01 |
|                                                                          |                   | 111                                | 0.263     | 0.27 (0.18)            | 1.40E-01 |
| <b>WC adj. BMI (cm)</b><br>p= 8.48E-03 (0.990)                           | 2-15-33           | 211                                | 0.221     | -0.33 (0.19)           | 8.36E-02 |
|                                                                          |                   | 111                                | 0.255     | 0.07 (0.18)            | 7.16E-01 |
|                                                                          |                   | 221                                | 0.169     | 0.09 (0.22)            | 6.70E-01 |
|                                                                          |                   | 121                                | 0.214     | 0.65 (0.20)            | 1.22E-03 |
| <b>WC adj. BMI (cm)</b><br>p= 9.07E-03 (0.990)                           | 2-16-33           | 221                                | 0.184     | -0.27 (0.21)           | 2.06E-01 |
|                                                                          |                   | 211                                | 0.206     | -0.04 (0.20)           | 8.55E-01 |
|                                                                          |                   | 121                                | 0.244     | 0.02 (0.19)            | 8.94E-01 |
|                                                                          |                   | 111                                | 0.225     | 0.64 (0.19)            | 8.41E-04 |
| <b>WC adj. BMI (cm)</b><br>p= 1.59E-02 (0.990)                           | 16-30-40          | 221                                | 0.057     | -0.39 (0.37)           | 2.85E-01 |
|                                                                          |                   | 211                                | 0.338     | -0.29 (0.16)           | 7.21E-02 |
|                                                                          |                   | 111                                | 0.332     | 0.01 (0.16)            | 9.74E-01 |
|                                                                          |                   | 112                                | 0.091     | 0.12 (0.28)            | 6.66E-01 |
|                                                                          |                   | 212                                | 0.087     | 0.42 (0.30)            | 1.62E-01 |
|                                                                          |                   | 121                                | 0.063     | 1.02 (0.35)            | 4.08E-03 |
| <b>WC adj. BMI (cm)</b><br>p= 1.79E-02 (0.990)                           | 16-33-41          | 121                                | 0.052     | -0.81 (0.38)           | 3.53E-02 |
|                                                                          |                   | 221                                | 0.057     | -0.57 (0.36)           | 1.16E-01 |
|                                                                          |                   | 211                                | 0.329     | -0.27 (0.16)           | 9.68E-02 |
|                                                                          |                   | 112                                | 0.101     | 0.11 (0.28)            | 6.93E-01 |
|                                                                          |                   | 212                                | 0.098     | 0.38 (0.28)            | 1.71E-01 |
|                                                                          |                   | 111                                | 0.329     | 0.40 (0.16)            | 1.42E-02 |
| <b>WC adj. BMI (cm)</b><br>p= 9.62E-03 (0.990)                           | 9-14-33           | 112                                | 0.066     | -0.10 (0.33)           | 7.60E-01 |
|                                                                          |                   | 121                                | 0.218     | -0.09 (0.19)           | 6.40E-01 |
|                                                                          |                   | 111                                | 0.369     | 0.04 (0.16)            | 8.00E-01 |
|                                                                          |                   | 221                                | 0.095     | 0.08 (0.29)            | 7.86E-01 |
|                                                                          |                   | 211                                | 0.176     | 0.50 (0.21)            | 1.84E-02 |
| <b>WC adj. BMI (cm)</b><br>p= 1.87E-02 (0.995)                           | 7-15-33           | 122                                | 0.057     | -0.82 (0.37)           | 2.76E-02 |
|                                                                          |                   | 211                                | 0.087     | -0.56 (0.30)           | 6.47E-02 |
|                                                                          |                   | 112                                | 0.061     | -0.44 (0.35)           | 2.12E-01 |
|                                                                          |                   | 111                                | 0.388     | -0.02 (0.16)           | 8.87E-01 |
|                                                                          |                   | 121                                | 0.321     | 0.40 (0.17)            | 1.65E-02 |
|                                                                          |                   | 221                                | 0.061     | 0.53 (0.38)            | 1.60E-01 |
| <b>WC adj. BMI (cm)</b><br>p= 9.86E-03 (0.995)                           | 2-17-33           | 221                                | 0.116     | -0.21 (0.27)           | 4.40E-01 |
|                                                                          |                   | 121                                | 0.134     | -0.15 (0.24)           | 5.48E-01 |
|                                                                          |                   | 211                                | 0.274     | -0.12 (0.18)           | 4.88E-01 |
|                                                                          |                   | 111                                | 0.334     | 0.55 (0.16)            | 7.71E-04 |

BMI=Body-mass index, WC=waist circumference, SE=Standard error

<sup>a</sup> Permutation test based on 200 permutations.

<sup>b</sup> SNP names and characteristics could be found in Table 2.

<sup>c</sup> The major allele was coded as 1 and the minor one as 2.

<sup>d</sup> Association results are based on models adjusted for sex, age, education, occupational activity, sports activity, smoking, and alcohol intake, energy intake, fat intake, and fruit and vegetable intake.
